# Supplementary material
Source: PubMed Central journal article supplement (PMC2245841)
Supplement: plntphys_pp.107.110809_1.pdf [file plntphys_pp.107.110809_1.pdf]

|                     |     |                                                                                                                |
|---------------------|-----|----------------------------------------------------------------------------------------------------------------|
| AtAAH (At4g20070)   | 1   | MAVPHPSSSSSSRSHPLSHVYHTSFHHHHHHNPSFTFWCLFSLLSPLAISSSSSSSS                                                      |
| AtAAH-2 (At5g43600) | 1   | .....MESLRFPCSIALLIISLIISSSLAQQQQHF                                                                            |
| GmAAH               | 1   | .....MSSATASNTFFLSCFLLECLLSAFSCVSMFSGIE                                                                        |
| AiC (E. coli)       | 1   | .....                                                                                                          |
|                     |     |                                                                                                                |
| AtAAH (At4g20070)   | 61  | SSDSSSSSHISIGITETRGTHOLHCALRDEAVARIHELQVSDAATHERRFMS                                                           |
| AtAAH-2 (At5g43600) | 33  | IRMEDEFSGYPIHEPQFCSINLASSLSVDAFGLQNOIDELSSFS..DAPSPSTRVLY                                                      |
| GmAAH               | 36  | IG.....DLEK...DDIFPQILRDEAVARIYELQVSDASGYERRTFLS                                                               |
| AiC (E. coli)       | 1   | .....MITFRQAIETPWLSSFS..ADPAGGTRLLYS                                                                           |
|                     |     |                                                                                                                |
| AtAAH (At4g20070)   | 120 | PASPRATPLTIGWEDAGLSTWVLYGNVHGRVPKNGSSCALIGSHMDTVDAQKYDG                                                        |
| AtAAH-2 (At5g43600) | 91  | DKDSRRRYGNLALAGLIVREDAIGNIFGADGLEPILPATSSHIDAPYSKRYDG                                                          |
| GmAAH               | 78  | PASPRATDILIKWEDAGLRTWVLYGNVHGRVDCANENAEALIGSHMDTVVDAGMDG                                                       |
| AiC (E. coli)       | 34  | PEWRETQQQFRRMAASGLETRFDIGNIYGRNGTEYPCQVILSSSHIDTVNIGNLDG                                                       |
|                     |     | ▲81      ▲92<br>(M1)      (M1+M2)                                                                              |
|                     |     |                                                                                                                |
| AtAAH (At4g20070)   | 180 | SLGISAISAKVLRDGLGLKRPVEVIAFSDREGVRFCTPLGSAIAGI....EV                                                           |
| AtAAH-2 (At5g43600) | 151 | VIGLSAIEAINVLR..SGFPKPSLEILFSEPTRFGLCLGRLAGSKRLA.EA                                                            |
| GmAAH               | 138 | SLGISAISAKVLRDGLKRPVEVIAFSDREGVRFCTPLGSGIAGI....FG                                                             |
| AiC (E. coli)       | 94  | QFGANLWLAIDWGLT..QYCAPRTVEVYAMAEEGSRIFVYVNGSKNIFGA...NEP                                                       |
|                     |     | ▲127<br>(M2)                                                                                                   |
|                     |     |                                                                                                                |
| AtAAH (At4g20070)   | 236 | SRLEVDKSGISVQALKENSIDITENLQCKLYDE..ASVWGVVEHIEQGPVLEWVGYP                                                      |
| AtAAH-2 (At5g43600) | 208 | LETTVFGQNVSTFANASAGYAEDKDDISSVLLKGSYFATFIEHIEQGFLEDEGLD                                                        |
| GmAAH               | 194 | ITLEISDKFEVMIKGLKENSMDITRESLIKLYDE..KSVWGVVEHIEQGPVLEWVGYP                                                     |
| AiC (E. coli)       | 149 | DVRNCCDAGNSFDKACGFTPMAPLTPR.....QDIKATVEHIEQGVLESNQGS                                                          |
|                     |     | ▲190<br>(M1)                                                                                                   |
|                     |     |                                                                                                                |
| AtAAH (At4g20070)   | 295 | IGVVKIAGQTRLKVTVSGSQHAGTVFMSMRQDPMTAAELIVLESVCKNKVYLSCN                                                        |
| AtAAH-2 (At5g43600) | 268 | IGVVTIAIPASLKVEEENGSHAGAVIMPYRIFAGIAAAEIAAIPKHVLESE.....                                                       |
| GmAAH               | 253 | IGVVKIAGQTRLKVTVSGSQHAGTVFMSMRQDPMAAAEIVVLESCKKPEVYLSYD                                                        |
| AiC (E. coli)       | 204 | IGVNVIVGRRYTVTNGESNHAGITPMGYRRTVYAFSRCHQSVEKAKR.....                                                           |
|                     |     | 213▲ 215      ▲226<br>(SO <sub>4</sub> ) (SO <sub>4</sub> )      (a1)<br><----- dimerisation domain (dd)-----> |
|                     |     |                                                                                                                |
| AtAAH (At4g20070)   | 355 | VOCNIDTVESLANSLVCTVGEISTWPSASNVIPQVTFITVDRTIDDVGRKATIDLSR                                                      |
| AtAAH-2 (At5g43600) | 322 | .....S..IDTVGTVGIELHFGAINSIKSKHLEIDTRIIDARRNTVIRKQES                                                           |
| GmAAH               | 313 | GHSSSTVKSLSSSLVCTVGEISTWPSASNVIPQVTFITVDRAIDDLGRAVIVDLSKQ                                                      |
| AiC (E. coli)       | 256 | .....G...DFLMTFGKLEPRENTVNVPGRTFTTIDRHTAAVLEDFTOQIEND                                                          |
|                     |     | ▲275      ▲288<br>(a1)      (a1+SO <sub>4</sub> )<br>----- (dd) -----                                          |
|                     |     |                                                                                                                |
| AtAAH (At4g20070)   | 415 | MYQICDRRSILCSIEKHDALAVSIPQDSQLKSANQSALKKMTGEVQDEVPMMSGAG                                                       |
| AtAAH-2 (At5g43600) | 371 | ANTIAKRRKVKLSEFIVNQLPPASDKLVKKMAEAA.....EAILSHKMMISRAY                                                         |
| GmAAH               | 373 | IYQICDRRSVSCITEKHDAGAVICISLSSQLKSANYSALKKMSQIQDEVFTMSGAG                                                       |
| AiC (E. coli)       | 306 | MRAICDGMIDGIDILWMDLPPPNKSLVATITELCE.....REKLNRYVHMSGAG                                                         |
|                     |     | ▲357<br>(SO <sub>4</sub> )<br>----- (dd) ----->                                                                |
|                     |     |                                                                                                                |
| AtAAH (At4g20070)   | 475 | HDAMAMAHLTKVGMFVRCRGGISHSPAHEVLDVWANGLATSEFLSQM...                                                             |
| AtAAH-2 (At5g43600) | 424 | HDSTFVNRISPGMIFPCYKCYSHKPEEYSSPDCANQVKVISTIAKLSLD.                                                             |
| GmAAH               | 433 | HDAMASHLTKVGMFVRCRGGISHSPAHEVLDVWANGLATSEFLSLS...                                                              |
| AiC (E. coli)       | 358 | HDAQIFPRVPTCMEFPSINGISNPAERTNITDREVKTAAMVYGLANQK                                                               |
|                     |     | ▲382<br>(M2+a1)                                                                                                |

Figure S1
