# Supplementary material
Source: PubMed Central journal article supplement (PMC2245841)

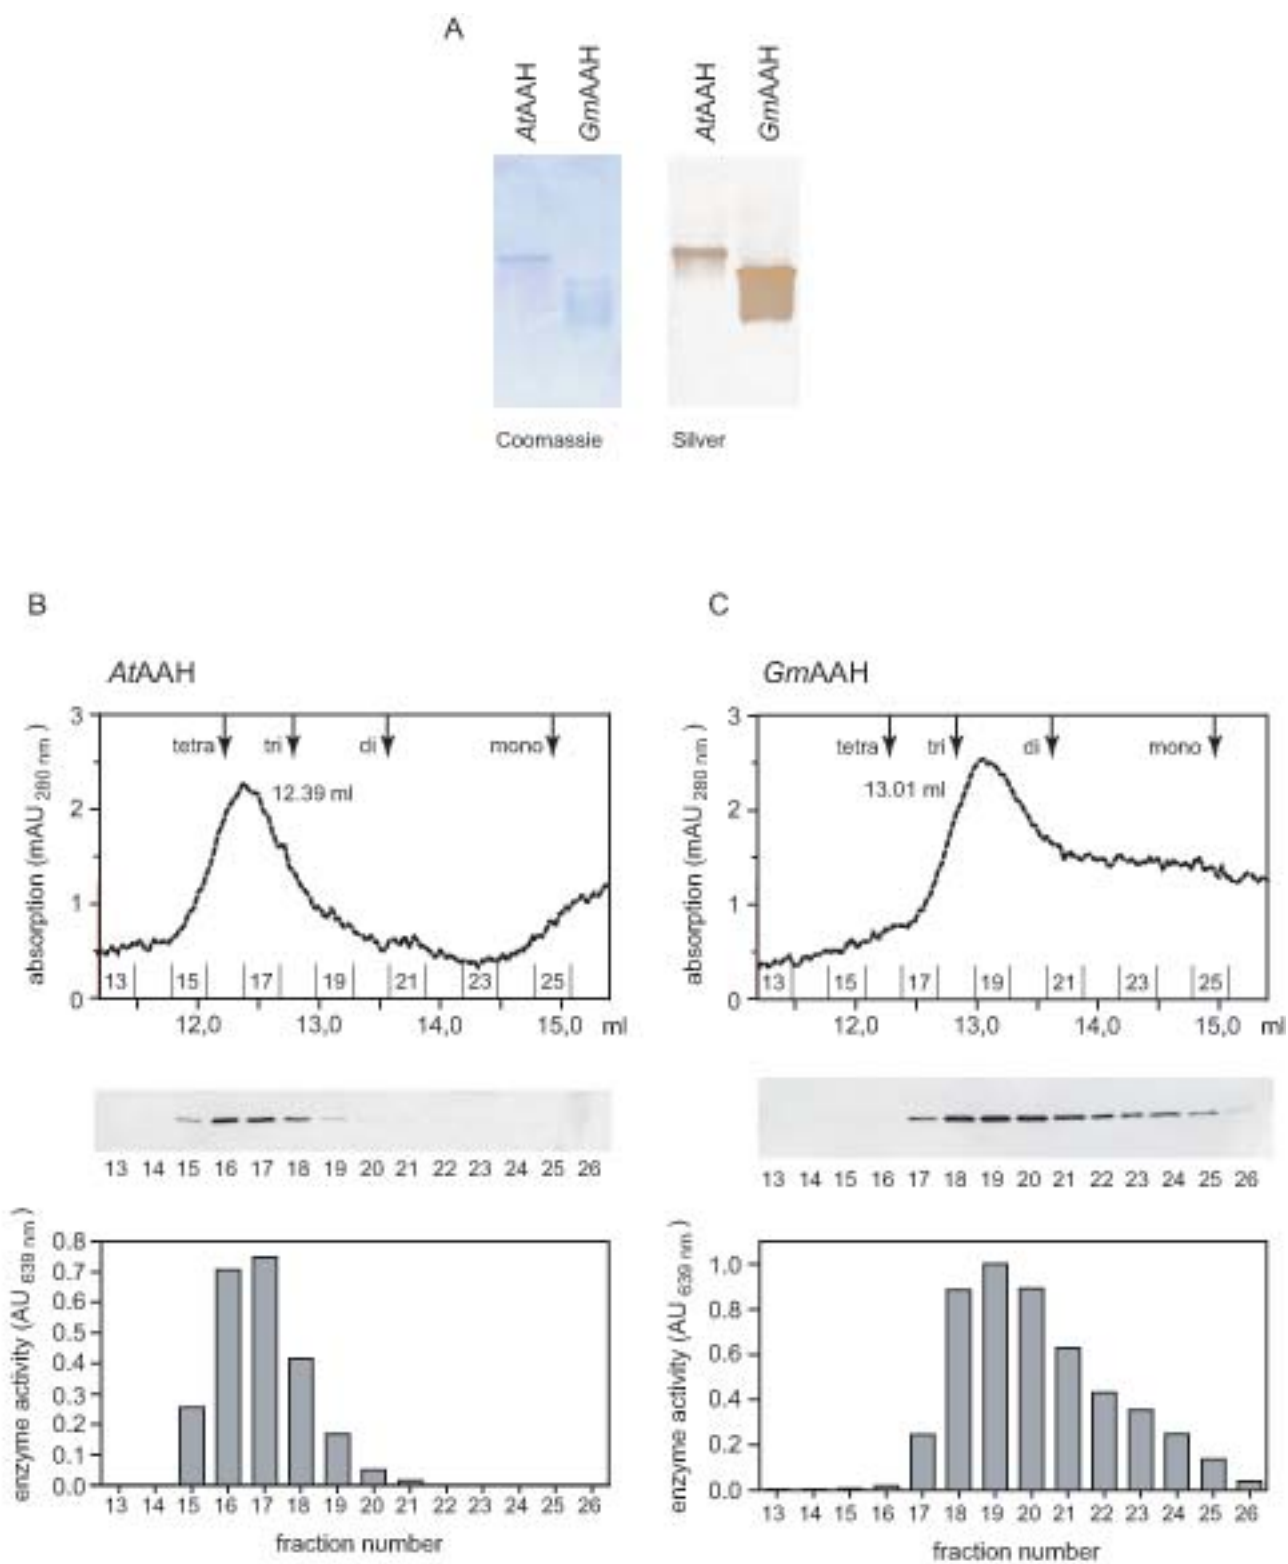

Figure S2

Supplement: plntphys_pp.107.110809_2.pdf [file plntphys_pp.107.110809_2.pdf]

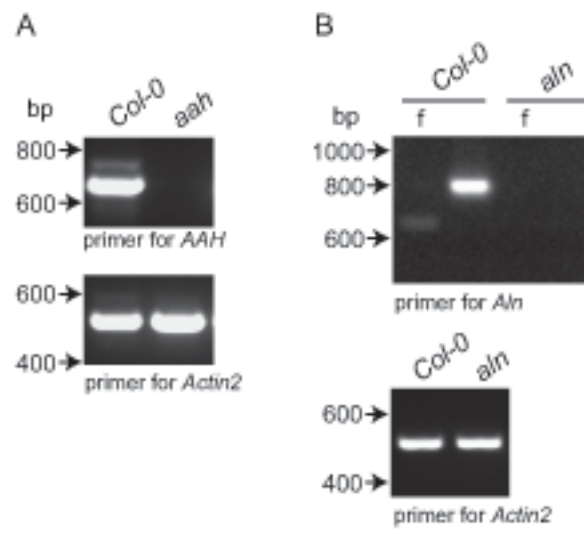

Figure S3

Supplement: plntphys_pp.107.110809_3.pdf [file plntphys_pp.107.110809_3.pdf]

Figure S4

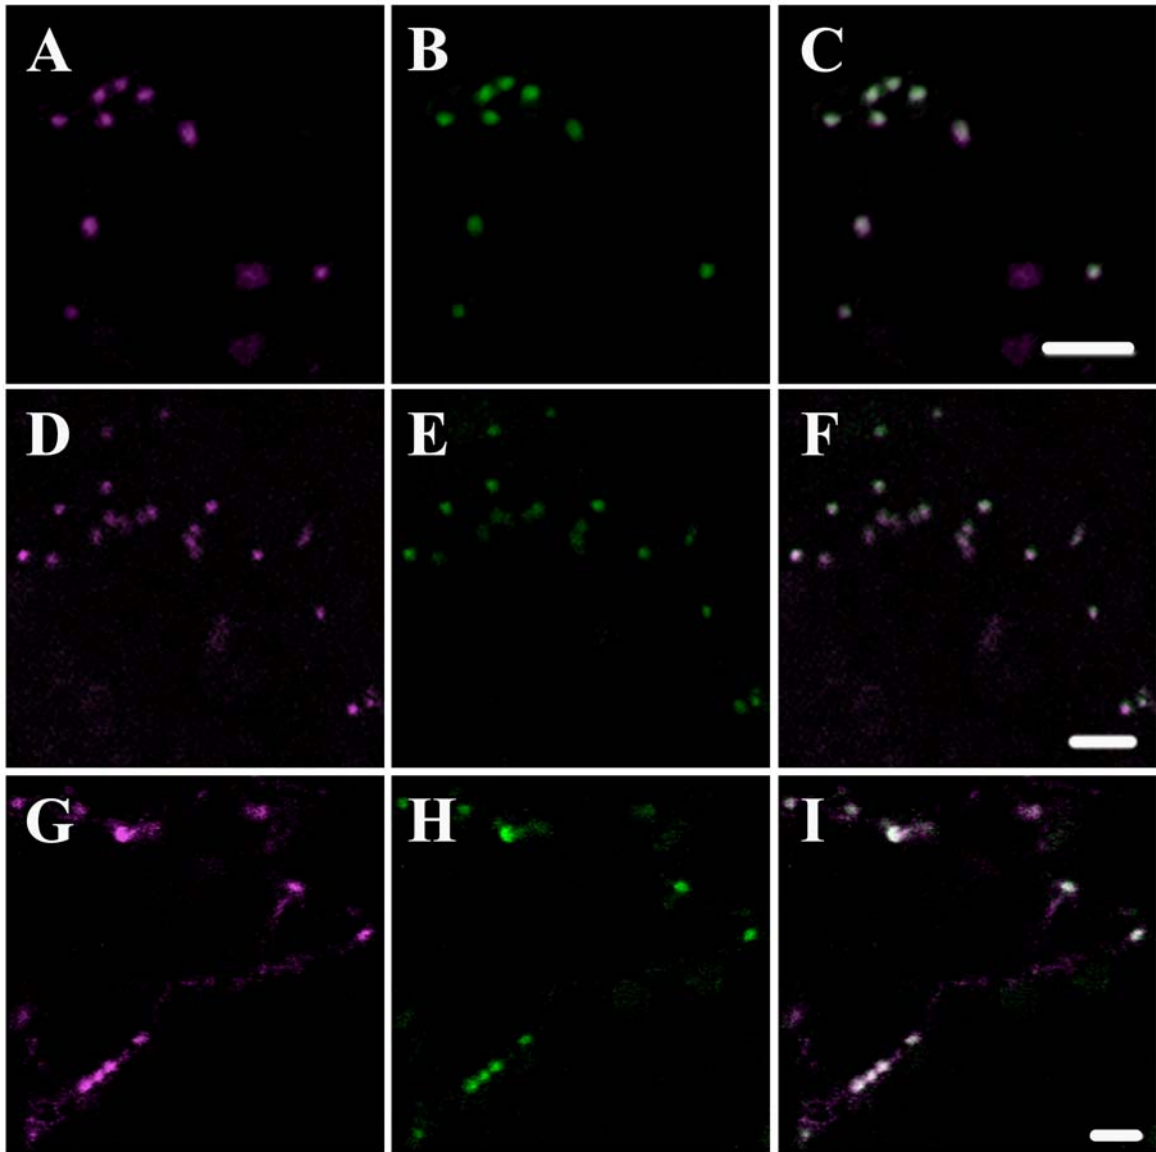

Supplement: plntphys_pp.107.110809_4.pdf [file plntphys_pp.107.110809_4.pdf]

Figure S5

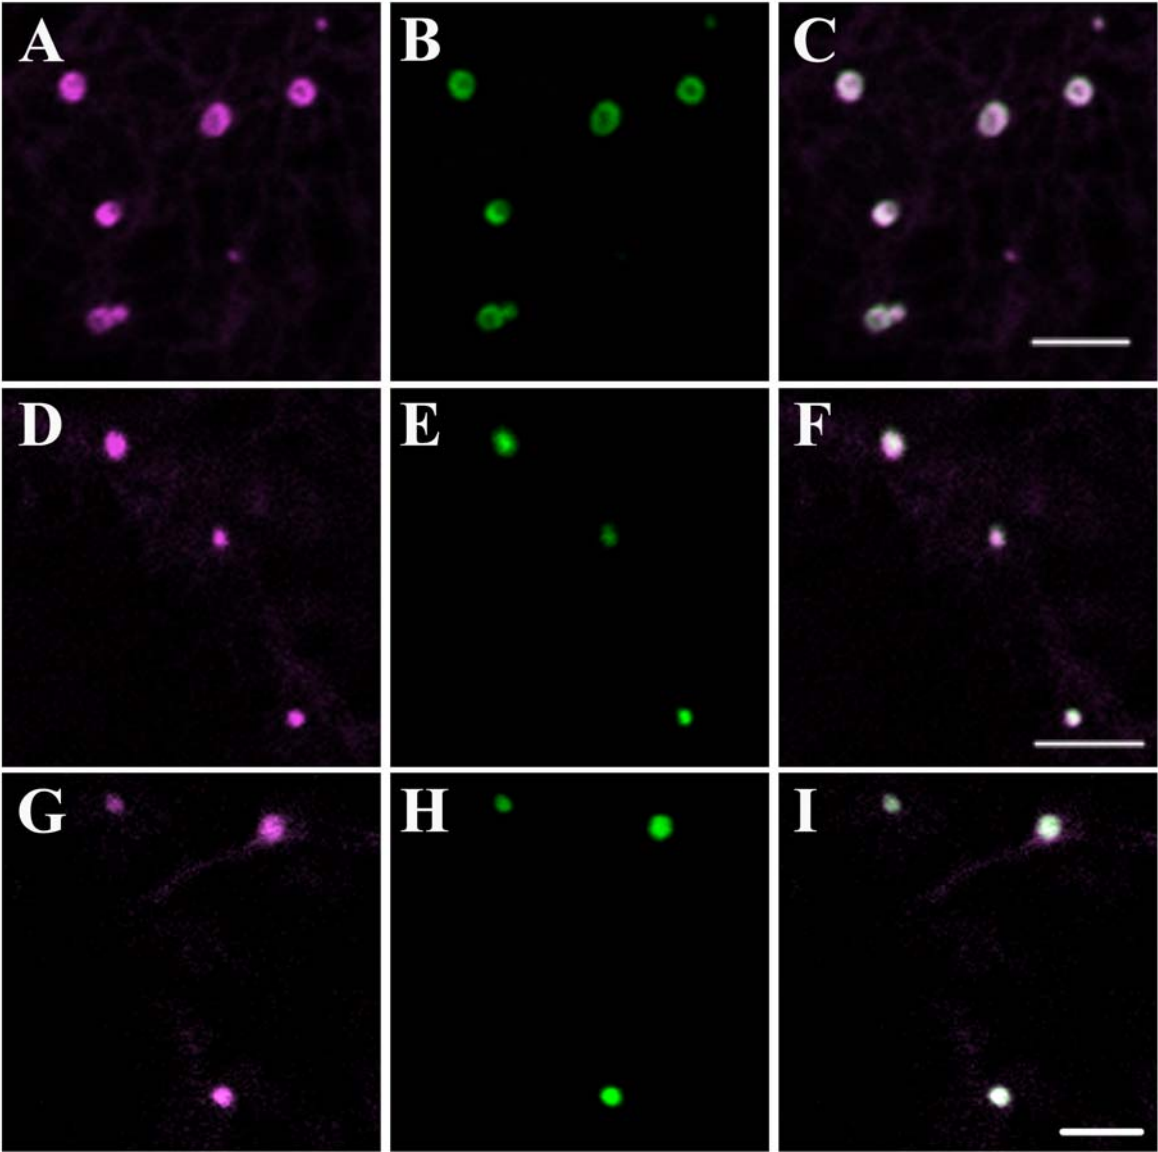

Supplement: plntphys_pp.107.110809_5.pdf [file plntphys_pp.107.110809_5.pdf]
